# Supplementary material for: Exploring Structural Diversity among Adhesion Devices Encoded by Lactococcal P335 Phages with AlphaFold2
Source: MDPI journal article supplement (doi:10.3390/microorganisms10112278), 2022-11-16

**Supplementary Figure S1. Plots of the pLDDT values (y-axis) *vs* the protein sequence (x-axis). (A)** Structure predictions of proteins from P335 phages types I and II. **(B)** Structure predictions of proteins from P335 phages types III and IV. The red dots squares identify the Dit arm-hand domain interacting with the RBP N-terminal domain. **(C)** Structure predictions of the NPS proteins from phages PhiLC3, TP901-1 and Tuc2009.

**A**

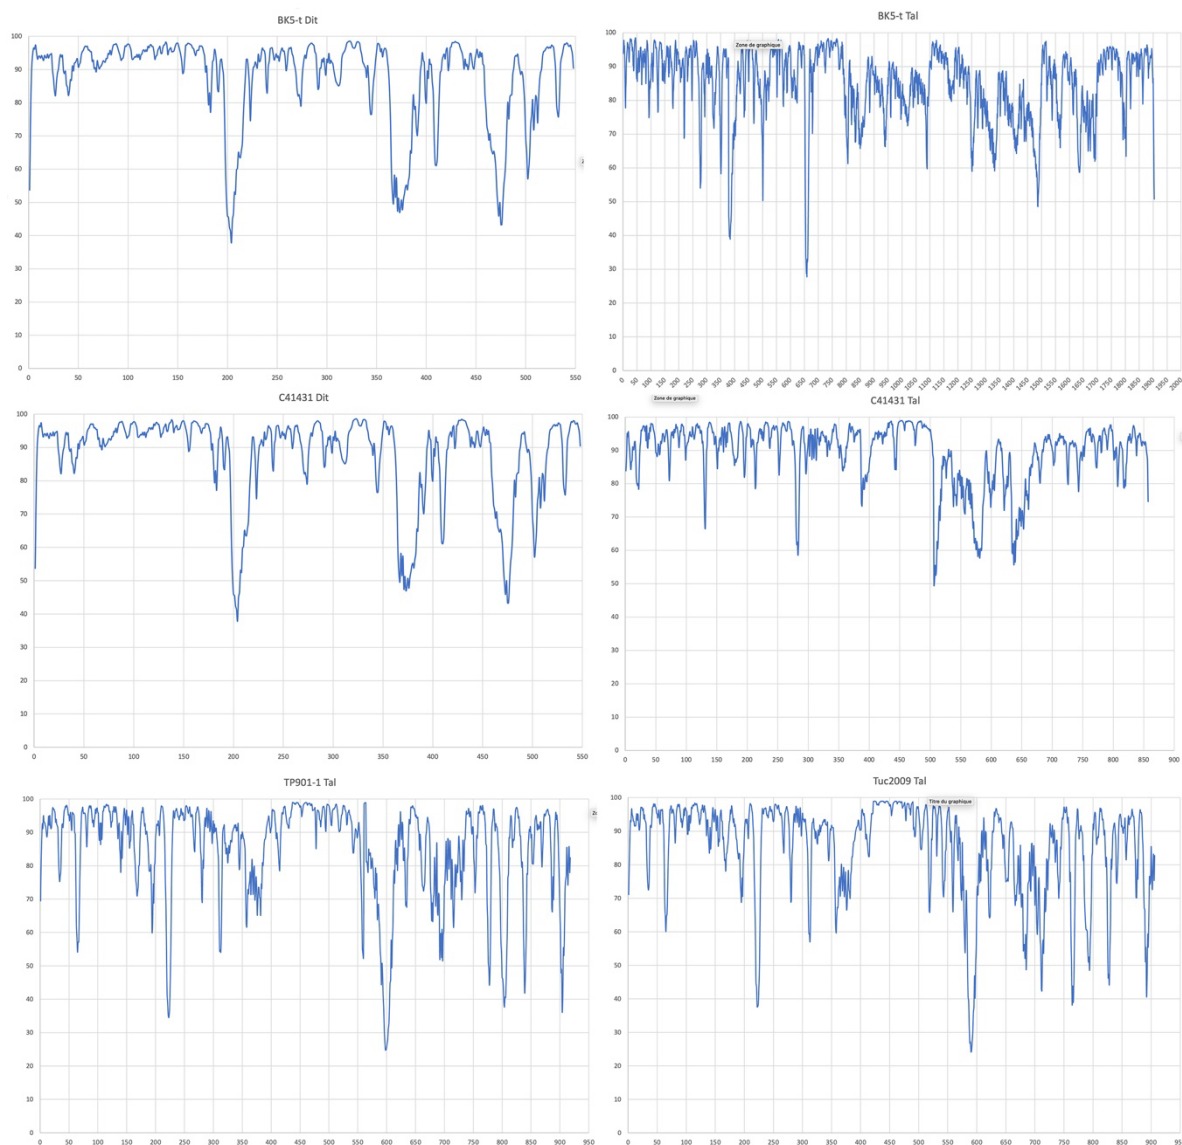

**B**

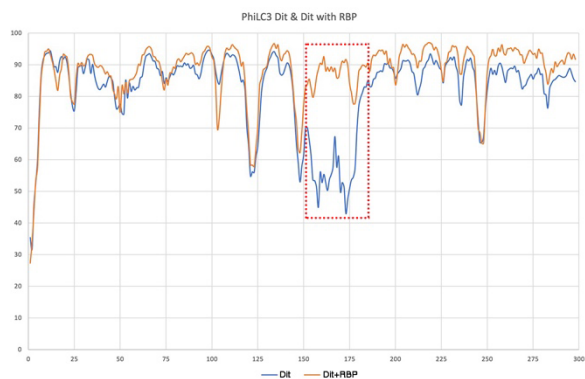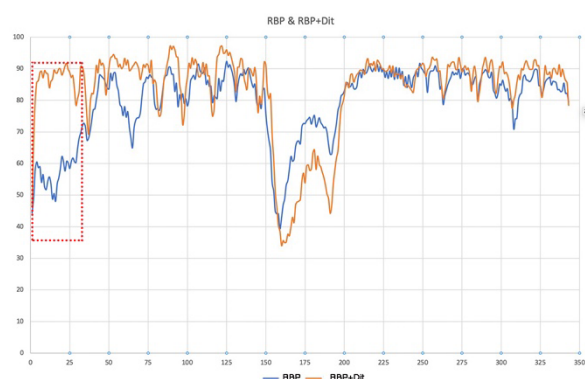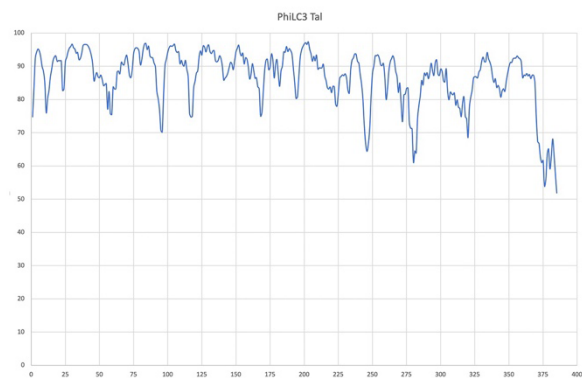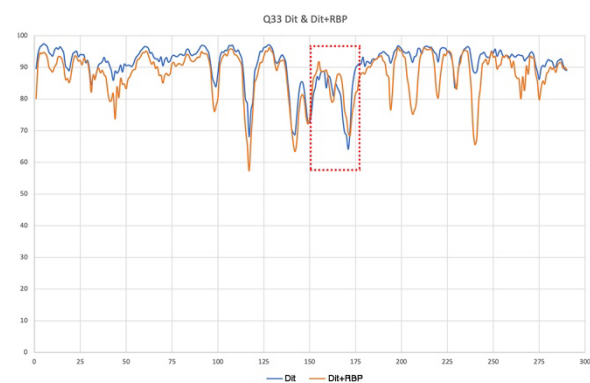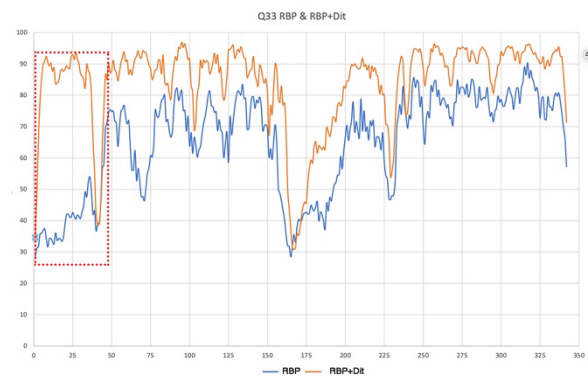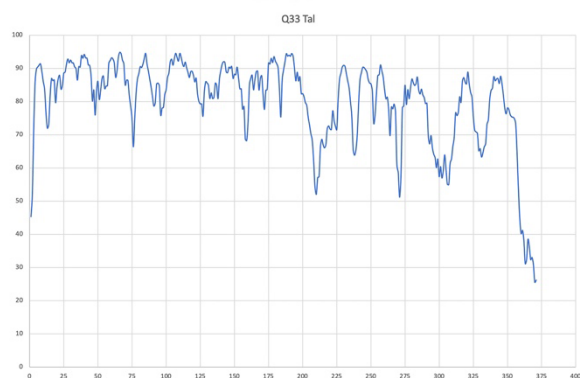

C

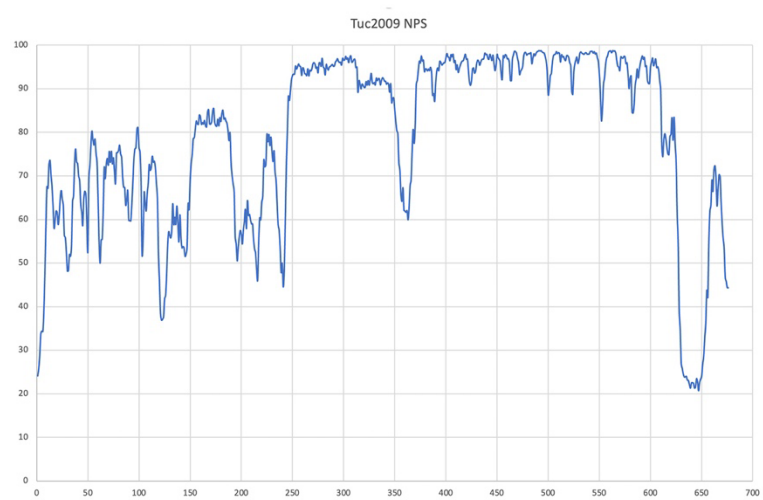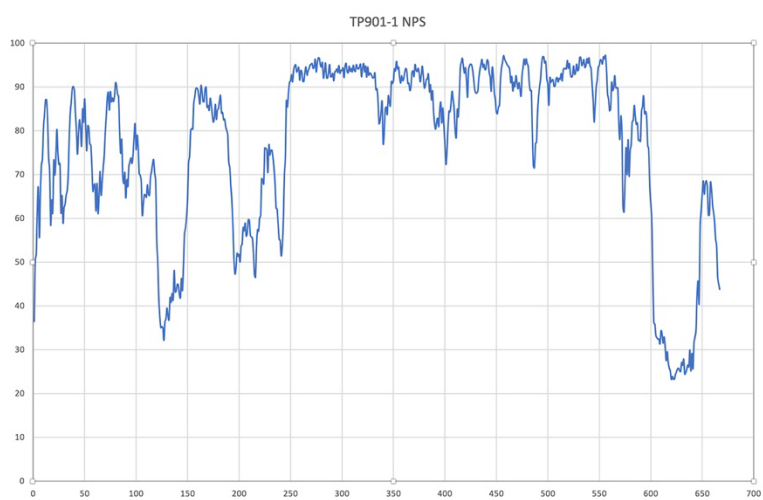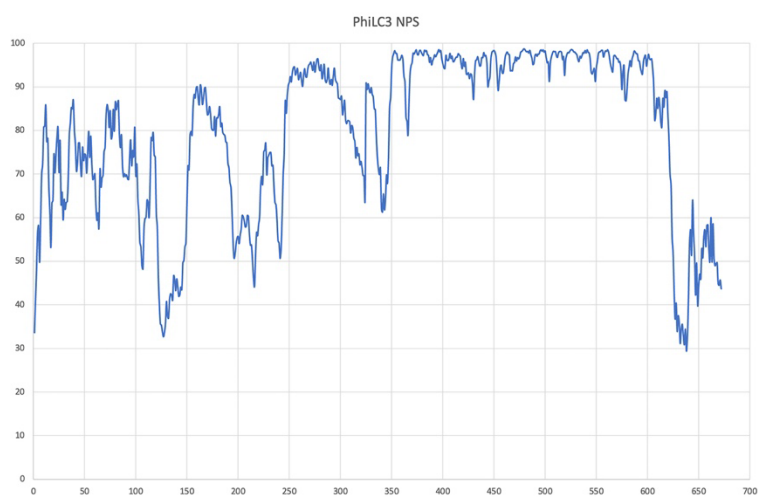

**RBP**

|             | 1                                                                                                                                     | 10  | 20  | 30  | 40  | 50  | 60 | 70 | 80 | 90 | 100 | 110 | 120 | 130 |
|-------------|---------------------------------------------------------------------------------------------------------------------------------------|-----|-----|-----|-----|-----|----|----|----|----|-----|-----|-----|-----|
| TP901-RBP   | HRSIKITVYRHKNGAETITNDOLERINSELTSGGNVVHKTGDETIAGKKKTFIGNVYVNSGLTLPKSHSGELGGGTLILRKKGTITVEYSIGGEISSTLHAGMSNLVNSVPVMEFCPRNRSL--VGHVIVGG  |     |     |     |     |     |    |    |    |    |     |     |     |     |
| Tuc2009-RBP | HAEIKTITVYRHKNGAETITNDOLNKLITL-----TVQKTGDETIAGKKTFSGDVSVDGDTFKKFKDYSVYVFFKNGSNTVITFAPMDCITAEVLVFLYGLNSIGGTTGPRKLTQYEAETGYTNG         |     |     |     |     |     |    |    |    |    |     |     |     |     |
| Consensus   | HReIkK T LRgHkNGAETITNDL#aiNsE.....tVqKTGDETIAGKKTFsG#eYVgdlT k kkadSgeagganigSgrkkgfTaeudcgaE elfihangnlgnrseinefITTSrRqci...aggntnG |     |     |     |     |     |    |    |    |    |     |     |     |     |
|             | 131                                                                                                                                   | 140 | 150 | 160 | 170 | 179 |    |    |    |    |     |     |     |     |
| TP901-RBP   | HNAFHIDIPS---SGVCMQFGPTASSGTPRGGTITYPIDASHNPQFEK                                                                                      |     |     |     |     |     |    |    |    |    |     |     |     |     |
| Tuc2009-RBP | HDNQASIMPTKAIISGLKKGLQYTFDIRDANGGGGKPHMHIKLYRN                                                                                        |     |     |     |     |     |    |    |    |    |     |     |     |     |
| Consensus   | h#aqaIdiPs.....SGLeqglapIdardirGrGggPidpanihkq#rn                                                                                     |     |     |     |     |     |    |    |    |    |     |     |     |     |

**Supplementary Figure S3. Sequence alignment of RBP sequences. (A)** phage TP901-1 *vs* PhiLC3. Residues involved in receptor binding are identified by red dots. **(B)** Tuc2009 *vs* Q33.

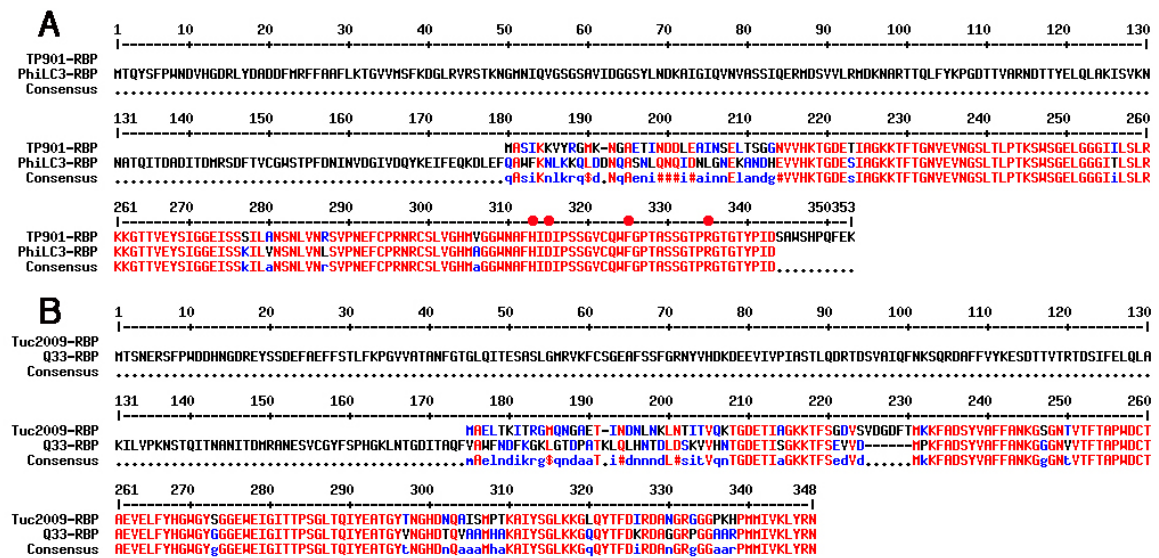

**Supplementary Figure S4** Structure and activation of phage p2 baseplate.. **(A)** The interaction between p2 Dit arm & hand domain and the RBP shoulders domain viewed from below the baseplate. **(B)** Structure of the p2 baseplate (Dit, Tal, RBP) viewed from above. **(C)** Lateral view of the p2 baseplate. **(D)** Structure of the p2 baseplate viewed from below. **(E)** Lateral view of the phage p2 activated baseplate. The RBPs have rotate 220° from the resting state.

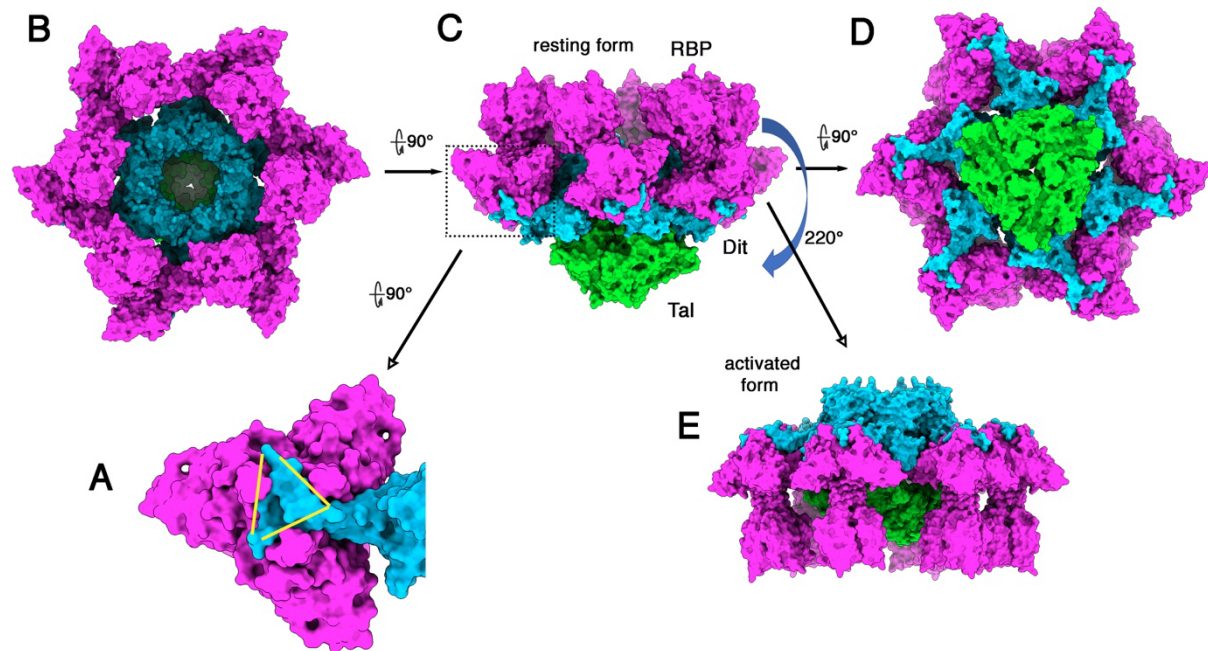



**Supplementary Figure S5.** Hydrogen bonds established between phage PhiLC3 RBP N-termini and the Dit arm and hand domain.

| Hydrogen bonds |       |          |           |          |           |
|----------------|-------|----------|-----------|----------|-----------|
| RBP            |       |          | dist; (Å) | Dit hand |           |
| 1              | B:TYR | 17[ N ]  | 2.84      | E:LEU    | 160[ O ]  |
| 2              | B:ASP | 10[ N ]  | 2.70      | E:PHE    | 162[ O ]  |
| 3              | B:LEU | 16[ O ]  | 3.36      | E:ASN    | 158[ ND2] |
| 4              | B:TYR | 17[ O ]  | 3.66      | E:LYS    | 159[ N ]  |
| 5              | B:TYR | 17[ O ]  | 3.29      | E:LEU    | 160[ N ]  |
| 6              | B:ASN | 97[ OD1] | 3.32      | E:THR    | 288[ OG1] |
|                |       |          |           |          |           |
| 1              | C:TYR | 17[ N ]  | 2.83      | E:LEU    | 164[ O ]  |
| 2              | C:ASP | 10[ N ]  | 2.74      | E:ILE    | 166[ O ]  |
| 3              | C:TYR | 17[ O ]  | 2.50      | E:LEU    | 164[ N ]  |
| 4              | C:ASP | 10[ OD2] | 2.95      | E:SER    | 165[ OG ] |
|                |       |          |           |          |           |
| 1              | D:ASP | 10[ N ]  | 2.69      | E:ALA    | 173[ O ]  |
| 2              | D:TYR | 17[ N ]  | 2.87      | E:PHE    | 170[ O ]  |
| 3              | D:ASN | 9[ OD1]  | 3.64      | E:ALA    | 173[ N ]  |
| 4              | D:ASP | 10[ O ]  | 2.84      | E:ILE    | 175[ N ]  |

**Supplementary Figure S6.** Buried surface area per residue between PhiLC3 RBP N-termini and the Dit arm and hand domain.

| <div> <div> <div></div> <div>Inaccessible residues</div> </div> <div> <div></div> <div>Solvent-accessible residues</div> </div> </div> <div> <div>BSA</div> <div>Buried Surface Area, Å²</div> </div> |      |        |       |       | <div> <div> <div></div> <div>Residues making Hydrogen/Disulphide bond, Salt bridge or Covalent link</div> </div> <div> <div></div> <div>Interfacing residues</div> </div> </div> <div> <div>ΔG</div> <div>Solvation energy effect, kcal/mol</div> </div> <div> <div>    </div> <div>Buried area percentage, one bar per 10%</div> </div> |      |        |       |       |
|-------------------------------------------------------------------------------------------------------------------------------------------------------------------------------------------------------|------|--------|-------|-------|------------------------------------------------------------------------------------------------------------------------------------------------------------------------------------------------------------------------------------------------------------------------------------------------------------------------------------------|------|--------|-------|-------|
| RBP                                                                                                                                                                                                   | HSDC | ASA    | BSA   | ΔG    | Dit hand domain                                                                                                                                                                                                                                                                                                                          | HSDC | ASA    | BSA   | ΔG    |
| B:PHE 6                                                                                                                                                                                               |      | 54.57  | 16.80 | 0.27  | E:ASN 148                                                                                                                                                                                                                                                                                                                                |      | 112.42 | 13.12 | -0.15 |
| B:PRO 7                                                                                                                                                                                               |      | 86.63  | 18.48 | 0.30  | E:LYS 149                                                                                                                                                                                                                                                                                                                                |      | 89.05  | 0.17  | 0.00  |
| B:TRP 8                                                                                                                                                                                               |      | 127.73 | 8.07  | -0.03 | E:SER 150                                                                                                                                                                                                                                                                                                                                |      | 73.22  | 33.11 | 0.25  |
| B:ASN 9                                                                                                                                                                                               |      | 134.70 | 31.94 | -0.14 | E:ASN 156                                                                                                                                                                                                                                                                                                                                |      | 102.09 | 16.13 | -0.17 |
| B:ASP 10                                                                                                                                                                                              | H    | 70.19  | 43.47 | 0.03  | E:ASP 157                                                                                                                                                                                                                                                                                                                                |      | 81.13  | 3.79  | -0.04 |
| B:ARG 15                                                                                                                                                                                              |      | 91.47  | 3.80  | -0.04 | E:ASN 158                                                                                                                                                                                                                                                                                                                                | H    | 118.79 | 76.50 | -0.12 |
| B:LEU 16                                                                                                                                                                                              | H    | 145.68 | 79.52 | 0.98  | E:LYS 159                                                                                                                                                                                                                                                                                                                                | H    | 103.80 | 3.37  | 0.05  |
| B:TYR 17                                                                                                                                                                                              | H    | 79.47  | 68.09 | 0.18  | E:LEU 160                                                                                                                                                                                                                                                                                                                                | H    | 72.67  | 67.47 | 0.50  |
| B:ASP 18                                                                                                                                                                                              |      | 86.82  | 64.89 | 0.41  | E:LYS 161                                                                                                                                                                                                                                                                                                                                |      | 146.29 | 52.58 | 0.72  |
| B:ALA 19                                                                                                                                                                                              |      | 65.57  | 20.34 | 0.21  | E:PHE 162                                                                                                                                                                                                                                                                                                                                | H    | 160.99 | 92.39 | 0.82  |
| B:ASP 20                                                                                                                                                                                              |      | 79.65  | 1.72  | -0.03 | E:PRO 163                                                                                                                                                                                                                                                                                                                                |      | 127.83 | 12.63 | 0.18  |
| B:ASP 21                                                                                                                                                                                              |      | 19.41  | 1.84  | -0.02 | E:PHE 172                                                                                                                                                                                                                                                                                                                                |      | 136.44 | 54.23 | 0.80  |
| B:PHE 22                                                                                                                                                                                              |      | 111.27 | 30.42 | 0.48  | E:ALA 173                                                                                                                                                                                                                                                                                                                                |      | 37.39  | 8.62  | 0.14  |
|                                                                                                                                                                                                       |      |        |       |       | E:PHE 162                                                                                                                                                                                                                                                                                                                                |      | 160.99 | 68.60 | 1.10  |
| C:PHE 6                                                                                                                                                                                               |      | 50.43  | 10.90 | 0.17  | E:PRO 163                                                                                                                                                                                                                                                                                                                                |      | 127.83 | 46.93 | 0.70  |
| C:PRO 7                                                                                                                                                                                               |      | 86.86  | 13.41 | 0.21  | E:LEU 164                                                                                                                                                                                                                                                                                                                                | H    | 67.21  | 52.31 | 0.02  |
| C:TRP 8                                                                                                                                                                                               |      | 132.23 | 7.89  | -0.04 | E:SER 165                                                                                                                                                                                                                                                                                                                                | H    | 70.69  | 39.34 | 0.26  |
| C:ASN 9                                                                                                                                                                                               |      | 137.10 | 44.63 | -0.20 | E:ILE 166                                                                                                                                                                                                                                                                                                                                | H    | 136.35 | 82.45 | 0.63  |
| C:ASP 10                                                                                                                                                                                              | H    | 73.83  | 61.79 | -0.18 | E:LYS 167                                                                                                                                                                                                                                                                                                                                |      | 134.05 | 31.91 | 0.51  |
| C:ARG 15                                                                                                                                                                                              |      | 84.96  | 3.08  | -0.04 | E:THR 168                                                                                                                                                                                                                                                                                                                                |      | 156.10 | 15.05 | 0.22  |
| C:LEU 16                                                                                                                                                                                              |      | 151.50 | 43.66 | 0.70  |                                                                                                                                                                                                                                                                                                                                          |      |        |       |       |
| C:TYR 17                                                                                                                                                                                              | H    | 74.31  | 65.39 | 0.18  | E:ILE 166                                                                                                                                                                                                                                                                                                                                |      | 136.35 | 53.91 | 0.86  |
| C:ASP 18                                                                                                                                                                                              |      | 83.95  | 20.35 | 0.27  | E:LYS 167                                                                                                                                                                                                                                                                                                                                |      | 134.05 | 5.89  | -0.02 |
| C:ALA 19                                                                                                                                                                                              |      | 65.39  | 22.45 | 0.24  | E:THR 168                                                                                                                                                                                                                                                                                                                                |      | 156.10 | 44.55 | 0.11  |
| C:PHE 22                                                                                                                                                                                              |      | 106.82 | 28.12 | 0.45  | E:ASP 169                                                                                                                                                                                                                                                                                                                                |      | 114.37 | 27.52 | 0.29  |
|                                                                                                                                                                                                       |      |        |       |       | E:PHE 170                                                                                                                                                                                                                                                                                                                                | H    | 62.88  | 46.37 | 0.08  |
| D:PHE 6                                                                                                                                                                                               |      | 41.25  | 4.34  | 0.07  | E:ALA 171                                                                                                                                                                                                                                                                                                                                |      | 42.29  | 32.07 | 0.51  |
| D:PRO 7                                                                                                                                                                                               |      | 84.51  | 17.81 | 0.29  | E:PHE 172                                                                                                                                                                                                                                                                                                                                |      | 136.44 | 82.22 | 1.25  |
| D:TRP 8                                                                                                                                                                                               |      | 125.35 | 7.74  | -0.04 | E:ALA 173                                                                                                                                                                                                                                                                                                                                | H    | 37.39  | 28.78 | 0.00  |
| D:ASN 9                                                                                                                                                                                               | H    | 136.85 | 78.68 | -0.21 | E:THR 174                                                                                                                                                                                                                                                                                                                                |      | 64.10  | 28.30 | 0.38  |
| D:ASP 10                                                                                                                                                                                              | H    | 68.16  | 60.18 | -0.19 | E:ILE 175                                                                                                                                                                                                                                                                                                                                | H    | 80.62  | 51.25 | 0.54  |
| D:VAL 11                                                                                                                                                                                              |      | 94.11  | 73.87 | 1.18  | E:PRO 177                                                                                                                                                                                                                                                                                                                                |      | 33.03  | 13.06 | 0.21  |
| D:HIS 12                                                                                                                                                                                              |      | 184.08 | 77.80 | -0.25 |                                                                                                                                                                                                                                                                                                                                          |      |        |       |       |
| D:ASP 14                                                                                                                                                                                              |      | 100.17 | 3.79  | -0.06 |                                                                                                                                                                                                                                                                                                                                          |      |        |       |       |
| D:ARG 15                                                                                                                                                                                              |      | 98.66  | 5.22  | -0.06 |                                                                                                                                                                                                                                                                                                                                          |      |        |       |       |
| D:LEU 16                                                                                                                                                                                              |      | 139.46 | 63.08 | 1.01  |                                                                                                                                                                                                                                                                                                                                          |      |        |       |       |
| D:TYR 17                                                                                                                                                                                              | H    | 70.54  | 60.08 | 0.05  |                                                                                                                                                                                                                                                                                                                                          |      |        |       |       |
| D:ASP 18                                                                                                                                                                                              |      | 83.06  | 35.46 | 0.44  |                                                                                                                                                                                                                                                                                                                                          |      |        |       |       |
| D:ALA 19                                                                                                                                                                                              |      | 63.37  | 17.40 | 0.18  |                                                                                                                                                                                                                                                                                                                                          |      |        |       |       |
| D:PHE 22                                                                                                                                                                                              |      | 103.67 | 59.97 | 0.96  |                                                                                                                                                                                                                                                                                                                                          |      |        |       |       |

**Supplementary Figure S7.** Comparison of the structural models of the adhesion devices with nsEM images. The nsEM images are reproduced in part from Figures 1 in references [2] and [3].

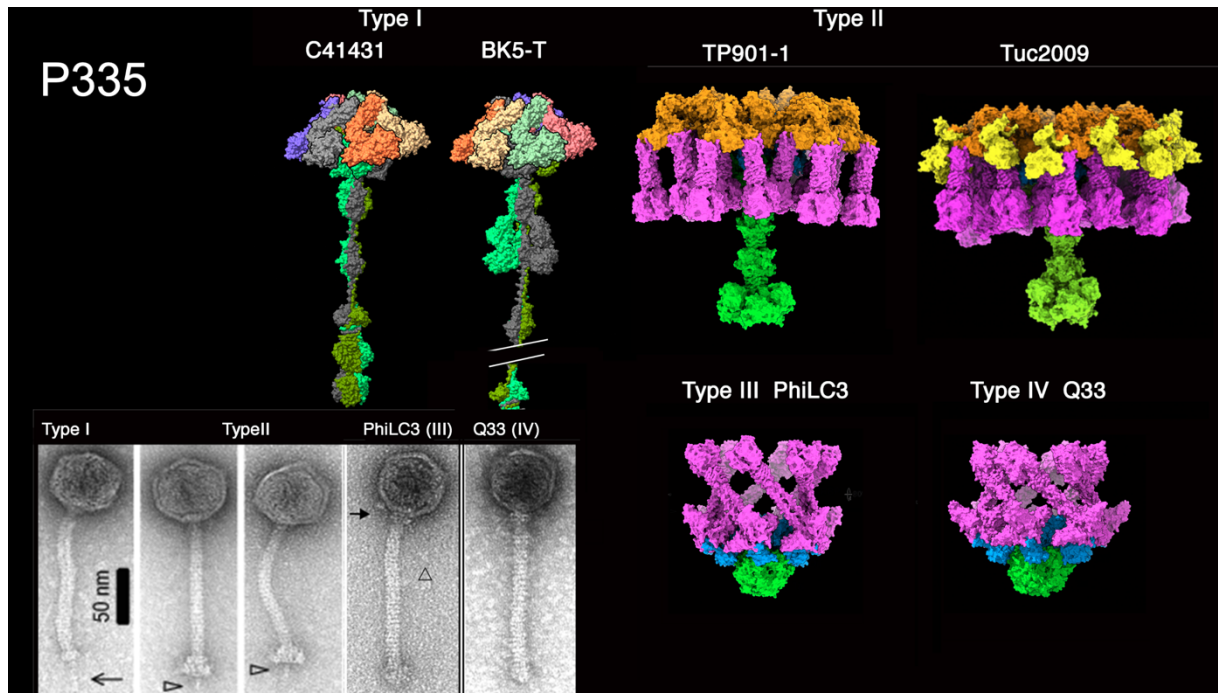

Supplement: s1 [file s1]
